# Supplementary material for: Long-term Evaluation Parameters in GNE Myopathy: A Five-year Observational Follow-up Natural History Study
Source: Research Square preprint supplement (doi:10.21203/rs.3.rs-909985/v1), 2021-10-13
Supplement: Supplementary file 1 [file 66d603bc97cd63aca1965fbe.docx]

Supplementary table 4

Correlation between quantitative items and simplified items

|  | Grip Power | Pinch Power | %FVC | CK | DEXA LEGs | MMT Elbow Flex | MMT Knee Ext |
| --- | --- | --- | --- | --- | --- | --- | --- |
| summed MMT | 0.795** | 0.689** | 0.720** | 0.742** | 0.542** | 0.942** | 0.760** |
| GMFM | 0.738** | 0.629** | 0.693** | 0.572** | 0.452* | 0.886** | 0.636** |
| 6MWT | 0.839** | 0.800** | 0.140 | 0.084 | 0.139 | 0.358 | 0.134 |
| DEXA Legs | 0.610** | 0.633** | 0.437* | 0.495** | 1.000 | 0.567** | 0.466** |

**:p<0.001

*: p<0.005

Quantitative items such as Summed MMT and GMFM were well correlated with pinch power, grip power, %VC or %FVC, CK, and DEXA (legs). These items were also correlated with certain muscle MMT scores (e.g., elbow flexion and knee extension).
