# Supplementary material for: Long-term Evaluation Parameters in GNE Myopathy: A Five-year Observational Follow-up Natural History Study
Source: Research Square preprint supplement (doi:10.21203/rs.3.rs-909985/v1), 2021-10-13
Supplement: Supplementary file 5 [file 0fb16b7e45845b874490a133.docx]

### Supplementary Table 1. Genotype frequency.

| mutation | n | % |
| --- | --- | --- |
| V603L homo | 9 | 27.3 |
| D207V/V603L | 4 | 12.1 |
| R160Q/D207V | 2 | 6.1 |
| p.414insT/V603L | 1 | 3.0 |
| C44A/E700R | 1 | 3.0 |
| C44S/A662I | 1 | 3.0 |
| C44S/I618N | 1 | 3.0 |
| C44S/M60T | 1 | 3.0 |
| C44S/V603L | 1 | 3.0 |
| P58L/D207V | 1 | 3.0 |
| T69M/D207V | 1 | 3.0 |
| D207V/ｃ.862＋4A>G | 1 | 3.0 |
| D207V/F264S | 1 | 3.0 |
| D207V/G250K | 1 | 3.0 |
| D207V/G739S | 1 | 3.0 |
| D207V/I503T | 1 | 3.0 |
| D207V/L634F | 1 | 3.0 |
| D207V/M743T | 1 | 3.0 |
| G326R/V452A | 1 | 3.0 |
| R451X/V603L | 1 | 3.0 |
| V603L/A622T | 1 | 3.0 |
|  | 33 | 100 |
